# Supplementary material for: Evaluating the association between brain atrophy, hypometabolism, and cognitive decline in Alzheimer’s disease: a PET/MRI study
Source: publisher site journal article supplement (doi:10.18632/aging.202580), 2021-02-26
Supplement: Supplementary file [file aging-v13i5-202580-supplementary-material-SD1.pdf]

## SUPPLEMENTARY FIGURE

### A Regions of interest (ROIs)

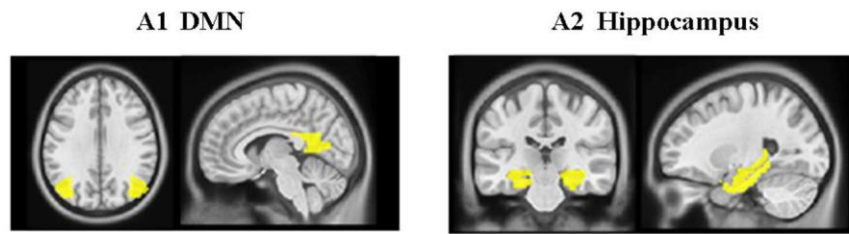

### B

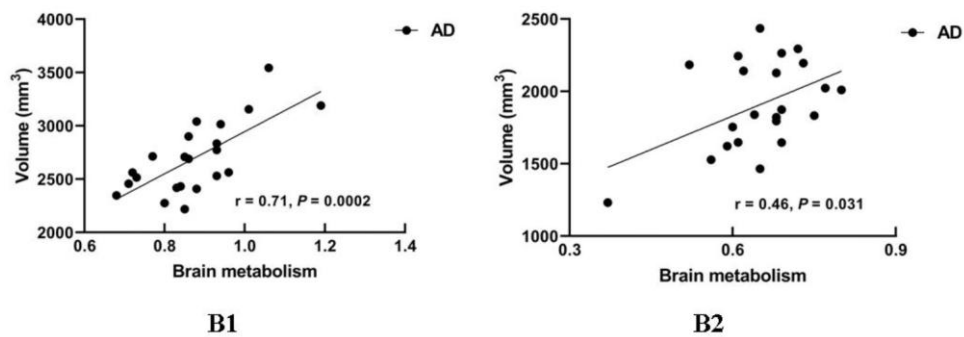

**Supplementary Figure 1. The relationship between SUVR and brain volumes in the AD group.** (A) ROIs of the DMN (A1) and hippocampus (A2) were defined based on template (shown in warm yellows). (B1) The GM volume of regions within the DMN had correlation with the 18F-FDG SUVR within the DMN mask. (B2) The GM volume in the hippocampus showed correlation with the 18F-FDG SUVR of hippocampus. Abbreviations: FDG, Fluoro-2-deoxy-D-glucose; DMN, default mode network.
