# Supplementary material for: Evaluating the association between brain atrophy, hypometabolism, and cognitive decline in Alzheimer’s disease: a PET/MRI study
Source: publisher site journal article supplement (doi:10.18632/aging.202580), 2021-02-26
Supplement: Supplementary file [file aging-v13i5-202580-supplementary-material-SD2.pdf]

## SUPPLEMENTARY TABLES

**Supplementary Table 1. Brain-behavior correlations in AD subjects.**

| Neuroimaging measures | Behavioral measures | Correlation coefficient | <i>P</i> value |
|-----------------------|---------------------|-------------------------|----------------|
| FDG_DMN               | MMSE                | 0.027                   | 0.915          |
|                       | MoCA                | 0.032                   | 0.901          |
|                       | AVLT                | -0.029                  | 0.910          |
|                       | DST                 | 0.044                   | 0.863          |
|                       | ADL                 | -0.085                  | 0.736          |
|                       | BNT                 | 0.276                   | 0.267          |
|                       | CFT                 | 0.365                   | 0.136          |
| Volume_DMN            | TMT                 | 0.157                   | 0.535          |
|                       | MMSE                | 0.467                   | 0.059          |
|                       | MoCA                | 0.272                   | 0.290          |
|                       | AVLT                | 0.245                   | 0.344          |
|                       | DST                 | -0.158                  | 0.544          |
|                       | ADL                 | -0.235                  | 0.364          |
|                       | BNT                 | -0.295                  | 0.251          |
| Volume_Hip            | CFT                 | 0.278                   | 0.279          |
|                       | TMT                 | 0.559                   | 0.020          |
|                       | MMSE                | 0.128                   | 0.612          |
|                       | MoCA                | 0.040                   | 0.876          |
|                       | AVLT                | 0.251                   | 0.315          |
|                       | DST                 | 0.350                   | 0.154          |
|                       | ADL                 | -0.309                  | 0.212          |
|                       | BNT                 | 0.277                   | 0.267          |
|                       | CFT                 | 0.067                   | 0.791          |
|                       | TMT                 | -0.152                  | 0.547          |

Note: Partial Pearson's correlation analysis was also performed to test the association between single parameter (e.g. brain atrophy or glucose metabolic reduction) and cognitive performance in the AD group. Statistical significance level was set at corrected  $P < 0.05$  (two-tailed). Abbreviations: AD, Alzheimer's disease; MMSE, Mini-Mental State Examination; MoCA, Montreal Cognitive Assessment; AVLT, Rey Auditory Verbal Learning Test; DST, Digit Span Test; ADL, Activities of Daily Living; BNT, Boston Naming Test; CFT, Rey-Osteirreth Complex Figure Test; TMT, Trail Making Test; NC, normal controls; FDG\_DMN, brain metabolism within the DMN; Volume\_DMN, volume of the DMN; Volume\_Hip, volume of hippocampus; FDG, Fluoro-2-deoxy-D-glucose; DMN, default mode network; Hip, hippocampus.

**Supplementary Table 2. Summary of logistic regression analysis for different MRI measure used as a predictor of AD.**

**(A1) Brain metabolism as outcome predictors.**

| Predictor                            | B     | SE B  | Wald | <i>P</i> value |
|--------------------------------------|-------|-------|------|----------------|
| Brain metabolism within the DMN mask | 28.35 | 10.30 | 7.57 | <b>0.006</b>   |

**(A2) GM volume as outcome predictors.**

| Predictor                    | B     | SE B  | Wald | <i>P</i> value |
|------------------------------|-------|-------|------|----------------|
| GM volume of the hippocampus | 0.020 | 0.008 | 6.66 | <b>0.010</b>   |

**(B1) The classification table of a model containing brain metabolism within the DMN mask.**

| Observed outcome                     | Predicted outcome |    | Percentage correct |
|--------------------------------------|-------------------|----|--------------------|
|                                      | AD                | NC |                    |
| AD                                   | 21                | 1  | 95.5               |
| NC                                   | 0                 | 24 | 100.0              |
| Overall accuracy percentage of index |                   |    | 97.8               |

Note: Model coded 0 for AD and 1 for NC. Abbreviations: AD, Alzheimer's disease; NC, normal controls; B, raw Beta coefficient; SE B, standard error for raw Beta coefficient.

**(B2) The classification table of a model containing GM volume of the hippocampus.**

| Observed outcome                     | Predicted outcome |    | Percentage correct |
|--------------------------------------|-------------------|----|--------------------|
|                                      | AD                | NC |                    |
| AD                                   | 21                | 1  | 95.5               |
| NC                                   | 2                 | 22 | 91.7               |
| Overall accuracy percentage of index |                   |    | 93.5               |

Note: Model coded 0 for AD and 1 for NC. Abbreviations: AD, Alzheimer's disease; NC, normal controls; B, raw Beta coefficient; SE B, standard error for raw Beta coefficient.
